# Supplementary material for: Service Users’ Perceptions About Their Hospital Admission Elicited by Service User–Researchers or by Clinicians
Source: Atypon-hosted journal article supplement (doi:10.1176/appi.ps.001912012), 2013-01-15

*Table: ANCOVA for outcome of the MacArthur Admission Experience Interview and CSQ8 according to discipline of the interviewer (service user researcher or clinician) controlled for age, gender and depressives symptoms.*

|                                                           | Type III Sum of Squares | df | Mean Square | F     | P   | Partial Eta Squared |
|-----------------------------------------------------------|-------------------------|----|-------------|-------|-----|---------------------|
| <b>Perceived coercion<sup>a</sup></b>                     |                         |    |             |       |     |                     |
| Corrected model                                           | 3.41                    | 3  | 1.14        | .28   | .84 | .01                 |
| Intercept                                                 | 112.25                  | 1  | 112.25      | 27.57 | .00 | .15                 |
| Age                                                       | 1.55                    | 1  | 1.55        | .38   | .54 | .01                 |
| Gender                                                    | .18                     | 1  | .18         | .05   | .83 | .00                 |
| Discipline of interviewer                                 | .72                     | 1  | .72         | .18   | .68 | .01                 |
| Levene's Test of Equality of Error Variance F=1.10, p=.30 |                         |    |             |       |     |                     |
| <b>Perceived Pressures<sup>b</sup></b>                    |                         |    |             |       |     |                     |
| Corrected model                                           | 2.74                    | 4  | .68         | .99   | .42 | .03                 |
| Intercept                                                 | 14.44                   | 1  | 14.44       | 20.91 | .00 | .16                 |
| Age                                                       | .74                     | 1  | .74         | 1.08  | .30 | .01                 |
| Gender                                                    | .11                     | 1  | .11         | .16   | .69 | .01                 |
| Depression                                                | 1.91                    | 1  | 1.91        | 2.76  | .10 | .02                 |
| Discipline of interviewer                                 | .14                     | 1  | .14         | .20   | .65 | .01                 |
| Levene's Test of Equality of Error Variance F=.00, p=.99  |                         |    |             |       |     |                     |
| <b>Procedural Justice<sup>c</sup></b>                     |                         |    |             |       |     |                     |
| Corrected model                                           | 4.95                    | 4  | 1.24        | 1.66  | .17 | .06                 |
| Intercept                                                 | 31.57                   | 1  | 31.57       | 42.25 | .00 | .28                 |
| Age                                                       | 1.22                    | 1  | 1.22        | 1.64  | .20 | .02                 |
| Gender                                                    | .55                     | 1  | .55         | .74   | .39 | .01                 |
| Depression                                                | 3.19                    | 1  | 3.19        | 4.27  | .04 | .04                 |
| Discipline of interviewer                                 | .07                     | 1  | .07         | .10   | .76 | .01                 |
| Levene's Test of Equality of Error Variance F=.32, p=.58  |                         |    |             |       |     |                     |
| <b>Satisfaction with services<sup>d</sup></b>             |                         |    |             |       |     |                     |

|                                                                                                                                                                                                                                                                                                                                                                                                                                                                                                                                                                                                                                                                                      |         |   |         |       |     |     |
|--------------------------------------------------------------------------------------------------------------------------------------------------------------------------------------------------------------------------------------------------------------------------------------------------------------------------------------------------------------------------------------------------------------------------------------------------------------------------------------------------------------------------------------------------------------------------------------------------------------------------------------------------------------------------------------|---------|---|---------|-------|-----|-----|
| Corrected model                                                                                                                                                                                                                                                                                                                                                                                                                                                                                                                                                                                                                                                                      | 232.52  | 4 | 58.13   | 1.74  | .15 | .07 |
| Intercept                                                                                                                                                                                                                                                                                                                                                                                                                                                                                                                                                                                                                                                                            | 1554.77 | 1 | 1554.77 | 46.53 | .00 | .33 |
| Age                                                                                                                                                                                                                                                                                                                                                                                                                                                                                                                                                                                                                                                                                  | 180.38  | 1 | 180.38  | 5.40  | .02 | .05 |
| Gender                                                                                                                                                                                                                                                                                                                                                                                                                                                                                                                                                                                                                                                                               | 20.52   | 1 | 20.52   | .61   | .44 | .01 |
| Depression                                                                                                                                                                                                                                                                                                                                                                                                                                                                                                                                                                                                                                                                           | .58     | 1 | .58     | .02   | .90 | .00 |
| Discipline of interviewer                                                                                                                                                                                                                                                                                                                                                                                                                                                                                                                                                                                                                                                            | 3.11    | 1 | 3.11    | .09   | .76 | .01 |
| Levene's Test of Equality of Error Variance F=1.60, p=.21                                                                                                                                                                                                                                                                                                                                                                                                                                                                                                                                                                                                                            |         |   |         |       |     |     |
| <p><sup>a</sup> MacArthur Perceived coercion scale, scores range from 0 to 5, with higher scores indicating higher levels of perceived coercion.</p> <p><sup>b</sup> MacArthur Perceived pressure scale, scores range from 0 to 4, with higher scores indicating higher levels of perceived pressures.</p> <p><sup>c</sup> MacArthur Procedural Justice scale, scores range from 1 to 4, with higher scores indicating the individual experienced lower levels of procedural justice.</p> <p><sup>d</sup> Client Satisfaction Questionnaire (CSQ8) is a self-reporting instrument with scores ranging from 8 to 32, with higher scores indicating higher levels of satisfaction.</p> |         |   |         |       |     |     |

*Table: Binary logistic regression model with perceived necessity of the admission as the dichotomous variable with age, gender, depressive symptoms and the discipline of the interviewer as predictor variables.*

| Variable                                                                                                | B    | S.E. | Wald | df | P   | Odds ratio | 95% C.I. |       |
|---------------------------------------------------------------------------------------------------------|------|------|------|----|-----|------------|----------|-------|
|                                                                                                         |      |      |      |    |     |            | Lower    | Upper |
| Gender                                                                                                  | .15  | .51  | .09  | 1  | .77 | 1.16       | .43      | 3.13  |
| Age                                                                                                     | -.24 | .02  | 1.55 | 1  | .21 | .98        | .94      | 1.01  |
| Depressive symptoms                                                                                     | -.08 | .03  | 9.85 | 1  | .01 | .92        | .87      | .97   |
| Discipline of interviewer                                                                               | -.05 | .50  | .01  | 1  | .93 | .96        | .36      | 2.56  |
| Regression model was significant, p=.01 and explained 12 to 19% of the variance in perceived necessity. |      |      |      |    |     |            |          |       |

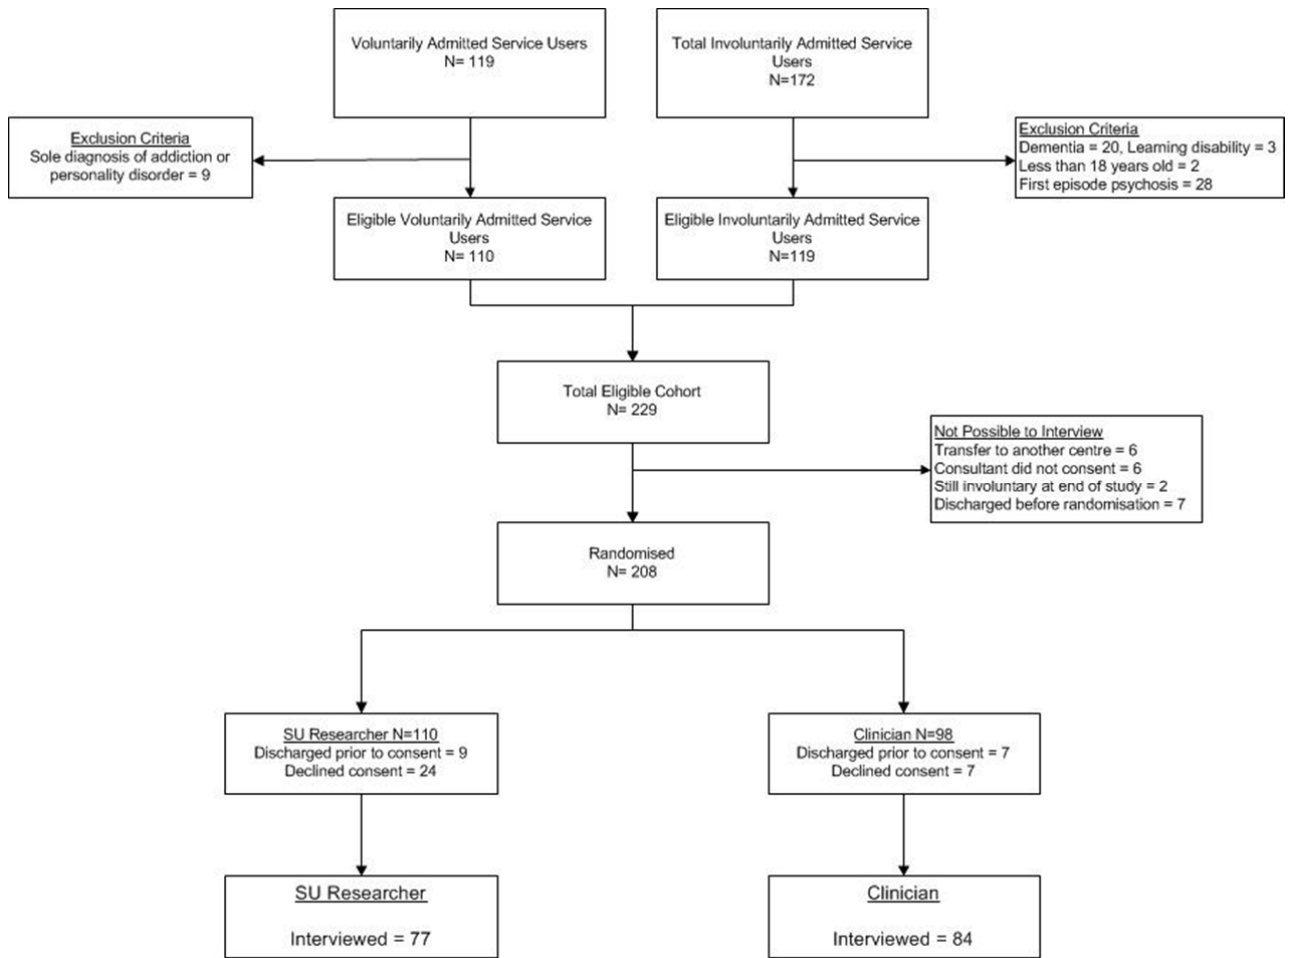

Supplement: 416_ds001.pdf [file 416_ds001.pdf]
